# Supplementary material
Source: publisher figshare collection journal article supplement (https://frontiersin.figshare.com/ndownloader/files/17960732)
Supplement: Supplementary file 1 [file 17960732]

## Sheet: Sheet 1
Supplementary Table S1: Table listing plate tectonic parameters used in this study as computed by GPlates. Conversion of these parameters to the carbon fluxes utilised in this study are outlined in the text; Table 1 lists conversion factors used in conjunction with these values.
Time (Ma)	Mid-ocean ridge length and oceanic crust parameters						Subduction zone parameters				Sedimentary carbon parameters			Continental rift parameters		Large igneous province parameters
	MOR length (m) [1]	Spreading rate (cm/yr) [1]	Spreading rate STDEV (cm/yr) [1]	Crustal CO2 (wt%) [1]	Crustal CO2 STDEV (wt%) [1]	OC area (m2) [1]	SZ length (m) [2]	SZ length (m) [3][4]*	Carbonate-intersecting SZ length (m) [5]	SZ mean orthogonal convergence rate (cm/yr) [3][4]*	Sediment carbon (Mt/yr) [6]	Sediment carbon min (Mt/yr) [6]	Sediment carbon max (Mt/yr) [6]	Continental rift length L1 (m) [7]	Continental rift length L2 (m) [7]	Total LIP area (km2) [8]	Continental LIP area (km2) [8]	Oceanic LIP area (km2) [8]
0	5.6669e+07	5.17479	4.01566	2.07712	0.471411	294436638606000	61940000	6.14804e+07	35340000	4.53728	56.5714	28.2	100.2	14500000	8.2e+06	619177	16752.8	602424
1	5.57913e+07	5.21297	4.12826	2.08227	0.442069	294806342402000	62242000	6.18713e+07	34860000	4.50976	54.5714	26.6286	97.8	15800000	8500000	118584	10623	107961
2	5.60051e+07	5.20717	4.09637	2.10821	0.430216	295359633040000	62409000	6.25559e+07	34890000	4.3621	52.8571	25.3429	95.9429	16000000	8500000	150373	18093.3	132280
3	5.56002e+07	5.20575	4.10818	2.08818	0.433945	295044627427000	63590000	6.33815e+07	34640000	4.36964	52.5714	25	95.2286	26500000	22900000	81523.2	275.08	81248.1
4	5.63865e+07	5.20792	4.12702	2.11357	0.434894	294898737114000	65964000	6.59734e+07	36690000	4.19236	53.1429	25.1143	95.2286	26500000	22800000	101870	6668.34	95201.7
5	5.52152e+07	5.18053	4.12567	2.11238	0.426125	294737022798000	65558000	6.55036e+07	36200000	4.56633	52.5714	24.6	94.2571	26600000	22800000	150605	15978.1	134627
6	5.58163e+07	5.21636	4.14727	2.1893	0.422268	294772399370000	65445000	6.5401e+07	35850000	4.46097	50.2857	23.4	91.0571	32400000	36200000	34949	0	34949
7	5.64241e+07	5.24324	4.2449	2.18885	0.408445	294683711088000	66097000	6.58658e+07	36080000	4.42689	46.8571	21.8857	85.2571	3.28e+07	36200000	160210	0	160210
8	5.4958e+07	5.30386	4.34032	2.19851	0.403726	294437309685000	66177000	6.5884e+07	36190000	4.49464	44	20.6	80.4857	33500000	36200000	177961	0	177961
9	5.68463e+07	5.36488	4.46555	2.22288	0.383251	295631186867000	64923000	6.46384e+07	35090000	4.61904	41.4286	19.4857	76.8857	33800000	36200000	157032	30134.4	126898
10	5.63864e+07	5.43014	4.5842	2.1982	0.407935	295377871659000	63583000	6.35067e+07	33760000	4.69996	38	17.8	71.6571	33800000	36200000	125595	38942.2	86652.8
11	5.79337e+07	5.44099	4.66091	2.23149	0.394923	295541351371000	62197000	6.12933e+07	33620000	4.41585	33.1429	15.2857	63.9143	33000000	36200000	63991.7	8810.28	55181.4
12	5.51249e+07	5.4429	4.73576	2.25208	0.413288	295465104678000	62081000	6.11396e+07	33450000	4.36672	29.1429	13.2571	58.1714	27700000	30500000	110964	0	110964
13	5.53257e+07	5.4278	4.75571	2.21839	0.474852	295432780796000	64737000	6.55266e+07	25820000	4.16456	28	12.5714	56.2571	27800000	30500000	32436.3	0	32436.3
14	5.63986e+07	5.37647	4.70282	2.22038	0.472435	295561417948000	65632000	6.53943e+07	26110000	4.17472	28.2857	12.6857	57.1714	27800000	30500000	538589	481756	56833
15	6.1249e+07	5.34903	4.65908	2.23465	0.452535	295495476613000	70121000	6.98527e+07	29160000	4.37136	28.2857	12.8571	57.8286	27900000	30500000	552667	481704	70963
16	6.25341e+07	5.36648	4.5533	2.24164	0.445016	295857782414000	70240000	6.98758e+07	29080000	4.30128	27.7143	12.7143	56.4	29300000	31600000	322531	238384	84147
17	6.26829e+07	5.46612	4.50273	2.25501	0.437568	295790234366000	70423000	6.82836e+07	29010000	4.35597	26.2857	12.1429	54.0857	29400000	31600000	235490	166467	69023
18	6.47512e+07	5.58346	4.50602	2.244	0.42522	295702919209000	70644000	6.84688e+07	29350000	4.36768	26	11.7714	53.7143	30000000	31600000	50032.9	0	50032.9
19	6.50665e+07	5.6846	4.49502	2.24132	0.415428	295687956823000	69926000	6.81428e+07	29430000	4.54279	26.8571	12.0286	55.8	30200000	31600000	108859	10239	98620
20	6.14652e+07	5.78976	4.47511	2.24152	0.419191	295580942548000	69867000	6.80825e+07	29260000	4.84584	28.2857	12.7429	59.0286	22000000	31600000	100475	10238.2	90236.8
21	6.40175e+07	5.80004	4.49162	2.23515	0.42427	295654109248000	69851000	6.96722e+07	29860000	4.90054	29.7143	13.4286	61.5714	22100000	31600000	17439.9	643.32	16796.6
22	6.36146e+07	5.83215	4.44549	2.25352	0.438191	295594210345000	69870000	6.97184e+07	29540000	4.99505	30.2857	13.7429	62.2	22300000	31600000	10425.6	643.1	9782.5
23	6.01976e+07	5.7948	4.36591	2.24804	0.441155	295386193189000	69821000	6.96893e+07	29550000	5.04815	30.5714	13.7143	61.5714	23100000	32400000	2192.53	0	2192.53
24	6.23126e+07	5.79856	4.3749	2.2502	0.439006	295267776691000	69669000	6.95344e+07	29410000	4.98005	30	13.2286	60.9714	30400000	39700000	294769	2295.59	292473
25	6.21409e+07	5.81601	4.37064	2.2613	0.441056	295127466713000	70008000	6.66946e+07	29170000	5.80373	30.2857	13.0857	61.4	30500000	39700000	292020	2296.07	289724
26	7.07875e+07	5.83058	4.39235	2.24912	0.412313	295408854192000	67433000	6.45441e+07	30850000	5.98237	31.4286	13.5714	62.8	30600000	37100000	2162.13	0	2162.13
27	6.95985e+07	5.74984	4.38716	2.24478	0.385363	295301784288000	67791000	6.62954e+07	31060000	5.68206	32.2857	13.7714	64.3143	30700000	37800000	7520.8	0	7520.8
28	6.771e+07	5.69554	4.40471	2.26021	0.354487	295236840651000	67351000	6.56259e+07	31060000	5.90114	32.2857	13.1143	64.8286	30800000	37800000	987.174	0	987.174
29	6.97067e+07	5.54484	4.37428	2.26253	0.36386	295202822975000	68138000	6.6298e+07	31450000	5.6437	32	12.6	64.4571	28700000	34300000	231112	89981.5	141130
30	7.01803e+07	5.40518	4.37171	2.25558	0.352366	295131145964000	68489000	6.85183e+07	31790000	5.51066	32	12.4857	64	27100000	33600000	864704	717048	147656
31	6.46364e+07	5.40493	4.42087	2.24174	0.366568	295490614432000	69485000	6.95091e+07	31960000	5.28137	32	12.3714	63.5714	27700000	33600000	725465	714851	10614
32	6.56463e+07	5.35262	4.43401	2.24438	0.363214	295284159061000	69725000	6.97492e+07	29880000	5.31559	30.5714	11.7429	61.1429	27700000	33600000	89741.4	84853.4	4888
33	6.88099e+07	5.29482	4.42987	2.24794	0.35978	295154572116000	69868000	6.84689e+07	29810000	4.70823	28.8571	11	58.2571	27600000	33600000	4188.52	0	4188.52
34	6.64284e+07	5.33776	4.44063	2.23552	0.357831	294930153130000	74247000	7.41647e+07	32940000	4.69052	28.5714	10.6857	58.1143	21200000	24900000	39923.4	5045.82	34877.6
35	7.11701e+07	5.32729	4.43218	2.23636	0.408127	294705166264000	75803000	7.4351e+07	32900000	5.28058	29.1429	10.6571	59.8571	21200000	24900000	40400.7	5045.81	35354.9
36	6.77959e+07	5.15968	4.37665	2.25164	0.365235	294581853963000	75540000	7.55656e+07	32190000	5.11209	28.8571	10.4286	59.8286	21300000	24900000	116491	58.34	116433
37	6.71536e+07	5.14857	4.40599	2.26219	0.363095	294475881586000	73937000	7.39605e+07	31360000	5.08676	27.7143	10	58.1429	21700000	24900000	663597	549567	114030
38	6.82127e+07	5.17387	4.45673	2.24982	0.368724	294247310635000	73746000	7.37695e+07	31550000	4.90517	26.8571	9.51429	56.8857	21200000	24800000	553181	549486	3695
39	6.81221e+07	5.17299	4.45685	2.24572	0.369887	294052109777000	73576000	7.35975e+07	32150000	4.94411	26.2857	9	55.9429	21300000	24800000	101036	9748.41	91287.6
40	6.64496e+07	5.16936	4.39283	2.23123	0.367673	293850738749000	70583000	7.06045e+07	29430000	4.90822	25.4286	8.51429	55.1143	21600000	24800000	513369	9748.39	503621
41	6.17712e+07	5.25173	4.29822	2.22856	0.395109	293756752247000	66230000	6.60713e+07	28410000	5.37761	24.8571	8.2	54.6	21700000	24800000	13775.5	0	13775.5
42	6.14808e+07	5.24077	4.12146	2.21876	0.390786	293504218333000	66063000	6.60862e+07	28720000	5.39979	24.2857	8.11429	53.2571	22100000	25200000	0	0	0
43	6.11596e+07	5.2185	3.91504	2.23297	0.385698	293315063591000	68507000	6.85292e+07	31730000	5.09821	23.4286	8.08571	50.3143	22100000	25200000	724.137	0	724.137
44	6.08566e+07	5.39447	3.83453	2.22299	0.382865	293164185748000	68281000	6.83022e+07	31560000	4.81466	22.5714	8.14286	47.8857	22100000	25200000	51477	48186	3291
45	6.08264e+07	5.59128	3.8076	2.17584	0.388858	293327327053000	70919000	7.09433e+07	31940000	4.69592	22	7.91429	46.2286	22600000	25200000	83840	74633.2	9206.8
46	6.2194e+07	5.76527	3.85614	2.20692	0.394397	293309698952000	70949000	7.09785e+07	32700000	4.42107	20.5714	7.14286	44.2	23400000	25200000	10382.2	0	10382.2
47	6.21752e+07	5.96687	3.97774	2.19587	0.395149	293286041068000	70791000	7.08218e+07	32320000	4.36564	19.4286	6.45714	43.5143	23500000	25200000	4970.99	0	4970.99
48	6.34288e+07	6.12106	4.13863	2.19418	0.40055	293030580256000	72651000	7.26829e+07	31870000	4.95917	19.4286	6.25714	44.6571	22100000	23700000	157244	0	157244
49	6.35639e+07	6.12903	4.24888	2.179	0.415923	293113580992000	71921000	7.19533e+07	31980000	4.96813	19.7143	6.2	45.0857	22100000	23700000	471366	0	471366
50	6.27484e+07	6.15533	4.3939	2.18646	0.418888	293162307108000	72006000	7.20393e+07	31610000	4.88177	20	6.31429	44.3429	21900000	23700000	326843	0	326843
51	6.39659e+07	6.15487	4.4477	2.17679	0.435136	293888659447000	69759000	6.97896e+07	31260000	5.03867	20.8571	6.85714	44.9143	22100000	23700000	3104	0	3104
52	7.06107e+07	6.0169	4.42756	2.1842	0.435823	293943400220000	76078000	7.61156e+07	33660000	5.14643	22	7.51429	46.8286	22200000	23700000	15274.9	0	15274.9
53	7.14562e+07	5.92003	4.40186	2.16044	0.449442	294500306686000	75885000	7.59225e+07	33140000	5.54868	22.5714	7.85714	48.6286	22400000	23700000	2630.89	0	2630.89
54	7.18914e+07	5.78207	4.35187	2.15636	0.449924	294562899415000	75983000	7.61265e+07	32760000	5.72707	23.7143	8.17143	49.8857	22900000	23700000	1776.74	0	1776.74
55	7.20057e+07	5.64854	4.29308	2.16187	0.452307	294344736692000	76310000	7.65332e+07	32230000	5.69973	24.8571	8.71429	50.9143	23500000	23700000	91299.1	0	91299.1
56	6.91542e+07	5.53421	4.25931	2.20523	0.436334	296414327452000	70895000	6.97008e+07	33060000	5.68247	25.7143	9.22857	51.4857	16700000	16800000	937230	849213	88017
57	7.06663e+07	5.54578	4.30287	2.18506	0.447878	296319138135000	70637000	7.00397e+07	32700000	5.85789	25.7143	9.25714	50.9714	17000000	16800000	853825	849654	4171
58	6.77433e+07	5.6614	4.4372	2.17229	0.437356	296178517455000	72324000	7.23204e+07	32390000	5.52734	25.4286	8.94286	50.3143	17000000	16800000	4702.91	126.06	4576.85
59	6.90754e+07	5.83058	4.57162	2.17455	0.409029	296111354430000	72165000	7.21513e+07	32180000	5.73441	24.8571	8.37143	50.4	17200000	16800000	103401	15504.7	87896.3
60	6.90658e+07	6.0618	4.70887	2.18626	0.39359	296514859720000	72113000	7.21105e+07	32000000	5.79948	24	7.68571	50.4571	17700000	1.66e+07	215839	15502.7	200336
61	6.52857e+07	6.31892	4.82882	2.19522	0.374707	296853720250000	72024000	7.20415e+07	31910000	5.79544	23.1429	7.2	50.2286	18100000	1.66e+07	720165	424431	295734
62	6.40047e+07	6.57889	4.92315	2.19849	0.371627	296841658844000	72175000	7.21961e+07	32060000	6.20382	23.1429	7.11429	51.4286	18600000	1.66e+07	613086	424502	188584
63	6.39395e+07	6.70959	4.83592	2.20164	0.379084	296931739989000	71125000	7.11477e+07	32580000	6.40776	24	7.14286	53.9714	18400000	1.66e+07	15587	61.04	15526
64	6.34263e+07	6.77698	4.67918	2.21221	0.366132	296934762410000	71214000	7.12368e+07	28530000	6.7399	24.2857	7.08571	55.5429	18600000	1.66e+07	662629	625879	36750
65	6.49149e+07	6.75775	4.50578	2.23787	0.333176	296923345408000	71096000	7.11212e+07	28960000	6.3251	24.2857	7	55.7429	18800000	1.66e+07	619853	569443	50410
66	6.68926e+07	6.72387	4.33494	2.25394	0.316386	296953086386000	63117000	6.31204e+07	25510000	6.64983	24.2857	7.05714	55.2857	17800000	15600000	272145	9753.4	262392
67	6.7465e+07	6.70366	4.16008	2.2703	0.297481	296937537066000	62920000	6.29236e+07	25690000	6.78755	24.2857	7.4	54.4286	18300000	15600000	239242	0	239242
68	7.2407e+07	6.70457	4.07876	2.29589	0.279359	298065186425000	64589000	6.45935e+07	28180000	6.65037	24.5714	8	53.2857	18400000	15600000	69212.2	0	69212.2
69	7.31595e+07	6.64625	4.04635	2.29159	0.283094	298038395614000	64600000	6.46043e+07	28210000	6.65291	25.1429	8.62857	53.1429	18500000	15600000	99504.6	0	99504.6
70	7.2837e+07	6.56428	4.01538	2.29725	0.281972	297961281002000	64706000	6.47109e+07	28120000	6.66647	26.2857	8.97143	55	18700000	15600000	44699.5	0	44699.5
71	7.46137e+07	6.50482	3.9807	2.30363	0.278442	298113936458000	65045000	6.50509e+07	27830000	6.78901	26.5714	8.88571	57.4286	19200000	15600000	10570.1	0	10570.1
72	7.45504e+07	6.40358	3.9629	2.3008	0.292215	298090593756000	64393000	6.43971e+07	26650000	6.85292	26.2857	8.71429	58.3714	19300000	15600000	2561.19	0	2561.19
73	7.32884e+07	6.28631	3.93629	2.30701	0.305426	298011292381000	64399000	6.44023e+07	26480000	6.65399	26	8.68571	57.7143	19400000	15600000	60295.4	0	60295.4
74	6.8662e+07	6.24476	3.95223	2.3099	0.303337	298115483394000	64392000	6.43951e+07	26340000	6.32532	25.7143	8.77143	56.9714	19100000	15600000	123417	0	123417
75	6.58356e+07	6.29237	3.98391	2.31576	0.303508	298038458738000	64398000	6.44016e+07	26360000	6.3654	26	8.88571	57.3714	19500000	15600000	172104	0	172104
76	6.88232e+07	6.41316	4.0688	2.33072	0.294251	298060635832000	73803000	7.07189e+07	33370000	6.29824	26.5714	9.02857	58.4	20200000	15600000	133373	0	133373
77	6.93969e+07	6.56733	4.13822	2.33635	0.301149	298106300093000	73689000	7.06627e+07	32060000	6.31576	26.5714	9.08571	58.7714	20700000	15600000	1166.53	0	1166.53
78	7.04075e+07	6.72599	4.20355	2.33575	0.318072	298135891987000	73621000	7.06233e+07	30990000	6.31361	26	8.97143	57.9714	21100000	15600000	42186.3	0	42186.3
79	7.12382e+07	6.65035	4.27101	2.3474	0.316528	297832881682000	73410000	7.04411e+07	31340000	6.6155	25.1429	8.45714	55.9714	21600000	15600000	771407	0	771407
80	6.85671e+07	6.62814	4.27078	2.34825	0.314032	297907171221000	73484000	7.05223e+07	30640000	6.81688	23.1429	7.45714	52.0571	17900000	15600000	749128	0	749128
81	6.85569e+07	6.47164	4.21784	2.34029	0.303095	298108554198000	71214000	6.8254e+07	28940000	6.87246	20	6.28571	46.7714	18200000	15600000	43392.7	0	43392.7
82	6.84887e+07	6.30659	4.07297	2.3431	0.304488	298183360779000	71307000	6.83514e+07	28880000	6.92228	17.4286	5.57143	40.9714	18600000	15600000	56551.1	0	56551.1
83	5.91332e+07	6.13213	3.94182	2.35706	0.27037	298285968740000	71412000	6.84596e+07	28620000	5.3343	16	5.37143	36.0571	18500000	15600000	22875	0	22875
84	5.99171e+07	6.2309	3.84923	2.34816	0.275402	298071679194000	70703000	6.76421e+07	27730000	5.50319	15.1429	5.57143	33.1714	18700000	15700000	220802	141553	79249
85	6.27561e+07	6.20583	3.80493	2.35742	0.285913	298107131606000	70863000	7.06536e+07	27920000	5.26013	16.5714	6.31429	34.0571	18800000	15700000	225155	141525	83630
86	6.91209e+07	6.19427	3.75587	2.3598	0.258508	298293450488000	69696000	6.94498e+07	27690000	6.07741	18.5714	7.45714	36.9143	18900000	15700000	2607.72	0	2607.72
87	6.50851e+07	6.22298	3.75752	2.35613	0.274343	298447016611000	69708000	6.94051e+07	27500000	6.08123	20	8.31429	38.8857	19000000	15600000	1040000	10853.8	1.02915e+06
88	6.52679e+07	6.25508	3.73473	2.3562	0.276912	298529666122000	69702000	6.93427e+07	27680000	6.08972	20.2857	8.48571	38.8857	19300000	15600000	1040000	10850.3	1.02915e+06
89	6.51346e+07	6.29486	3.71114	2.34815	0.273915	298746365349000	69745000	6.93045e+07	27780000	6.08282	19.4286	7.97143	37.8286	19500000	15600000	1100000	0	1100000
90	6.47735e+07	6.33361	3.68244	2.34594	0.274683	298903219455000	70856000	7.08395e+07	27870000	5.90531	18	7	36.0857	19300000	1.61e+07	1140000	25062.9	1.11494e+06
91	6.40642e+07	6.3819	3.65729	2.35156	0.282767	299264167450000	68723000	6.86732e+07	25350000	6.10586	16.5714	6.08571	34.4286	19300000	1.61e+07	46214.6	25073.8	21140.8
92	6.40183e+07	6.39831	3.66383	2.34832	0.284055	299308562880000	68720000	6.86597e+07	25320000	6.11177	15.7143	5.6	32.9429	19500000	1.61e+07	0	0	0
93	6.36189e+07	6.41962	3.6699	2.34915	0.28423	299479952109000	68716000	6.86498e+07	25290000	6.11764	14.8571	5.31429	31.4857	19500000	1.61e+07	5825.78	0	5825.78
94	6.22686e+07	6.44817	3.68276	2.35091	0.290979	299507783120000	68709000	6.86412e+07	25270000	6.12325	14.5714	5.4	30.8857	19900000	16500000	456642	0	456642
95	6.12809e+07	6.48213	3.69884	2.35587	0.28861	299548104794000	68700000	6.86327e+07	25180000	6.0598	15.1429	5.68571	31.0286	20000000	16500000	458967	0	458967
96	6.12503e+07	6.69294	3.75174	2.3568	0.285634	299481820179000	68746000	6.86723e+07	25160000	6.07885	15.1429	5.77143	30.8571	20100000	16500000	0	0	0
97	6.10388e+07	6.90797	3.83925	2.36846	0.295957	299497601797000	68890000	6.87212e+07	25010000	6.08861	14.8571	5.6	30.3714	20100000	16500000	0	0	0
98	6.12759e+07	7.08892	3.90765	2.35387	0.293932	299500266686000	68860000	6.87909e+07	24480000	6.08773	14.8571	5.57143	30.5143	20100000	16500000	0	0	0
99	6.15826e+07	7.25582	3.94589	2.35498	0.296459	299493281607000	68932000	6.88617e+07	24170000	6.09823	16	5.94286	32.6857	20100000	16500000	704938	129915	575023
100	6.904e+07	7.4086	3.96758	2.36787	0.31115	299935848300000	69514000	6.76936e+07	23800000	7.39956	17.7143	6.31429	35.9429	16900000	16500000	857899	129942	727957
101	7.48265e+07	7.40506	3.97846	2.35111	0.314274	300183650894000	65025000	6.75849e+07	23350000	7.57762	18.8571	6.28571	37.9714	24400000	36200000	171148	0	171148
102	7.55091e+07	7.35884	3.97099	2.35813	0.317711	300131957945000	64946000	6.7526e+07	23330000	7.56588	18.2857	5.77143	37.3714	24400000	36200000	2263.07	0	2263.07
103	7.55285e+07	7.31921	3.95841	2.35699	0.326191	300092632183000	64919000	6.74829e+07	23310000	7.62885	17.4286	5.28571	35.8	24400000	36200000	2561.11	0	2561.11
104	7.53558e+07	7.28949	3.9532	2.36483	0.341422	300064978219000	62037000	6.4585e+07	20380000	7.854	16.2857	4.94286	34.4857	24500000	36900000	0	0	0
105	7.53018e+07	7.2585	3.95913	2.36832	0.339473	299993306164000	62017000	6.45479e+07	20460000	7.68979	15.4286	4.74286	34.0286	24700000	36900000	0	0	0
106	7.43639e+07	7.11678	3.85479	2.37386	0.341803	299785185878000	62000000	6.45307e+07	20450000	7.46695	14.8571	4.54286	33.5429	26100000	36900000	0	0	0
107	7.44968e+07	6.99585	3.7071	2.36622	0.352823	299805564887000	61981000	6.45085e+07	20660000	7.49761	14.5714	4.74286	33.2	26300000	36900000	0	0	0
108	7.38867e+07	6.88346	3.55664	2.3736	0.336959	299814771061000	61965000	6.44886e+07	20670000	7.56864	15.7143	5.85714	33.7429	26700000	36900000	4235.2	0	4235.2
109	7.44422e+07	6.76043	3.39898	2.36907	0.328293	299992840256000	62198000	6.47215e+07	20840000	7.60991	16.8571	7.4	34.0571	26900000	36900000	1510000	437873	1072127
110	7.25261e+07	6.63799	3.22798	2.35622	0.333572	300009059486000	62185000	6.4711e+07	20790000	7.43583	17.1429	8.37143	32.6571	34300000	36200000	1510000	437874	1072126
111	7.71196e+07	6.64559	3.21929	2.35853	0.336191	300085006003000	61981000	6.19013e+07	19230000	7.91285	16.5714	8.54286	30.4857	34500000	36200000	0	0	0
112	7.7234e+07	6.67035	3.2203	2.35437	0.34051	300127725923000	61962000	6.18775e+07	19090000	7.97337	15.7143	8.08571	28.4	34700000	36200000	0	0	0
113	7.73147e+07	6.69422	3.22169	2.35021	0.339257	300161315246000	61951000	6.18622e+07	18920000	7.99459	14	6.8	25.6286	34400000	33900000	50382.6	0	50382.6
114	7.75236e+07	6.70795	3.22474	2.34856	0.338587	300210735101000	61939000	6.18495e+07	18930000	8.02806	11.7143	5.05714	22.2	34800000	33900000	50380.2	0	50380.2
115	7.73793e+07	6.72788	3.227	2.36156	0.319197	300257990182000	61915000	6.18393e+07	19000000	8.13489	9.42857	3.65714	19.3714	35200000	33900000	4.88979	0	4.88979
116	7.97234e+07	6.91912	3.36939	2.36864	0.306445	300310475826000	62964000	6.32123e+07	19080000	8.27639	8.28571	2.94286	17.8	35800000	32400000	3949.84	3949.84	0
117	7.97442e+07	7.36102	4.06008	2.36837	0.301607	300383037796000	62886000	6.31628e+07	19010000	8.31457	7.42857	2.57143	16.6571	36100000	32400000	3951.55	3951.55	0
118	7.98561e+07	7.79352	4.61749	2.36722	0.301075	300505790908000	62808000	6.31052e+07	19520000	8.35135	6.85714	2.34286	15.4286	37600000	32400000	0	0	0
119	7.93553e+07	8.24249	5.07497	2.37655	0.296582	300664492611000	62733000	6.30358e+07	19540000	8.36344	6.28571	2.25714	14.3429	39300000	32400000	4800000	1150870	3649130
120	7.05466e+07	8.73234	5.44972	2.38036	0.300496	300845813767000	62685000	6.29738e+07	15460000	9.29648	6	2.2	13.3714	41000000	32100000	4800000	1150840	3649160
121	7.78464e+07	8.96785	5.80465	2.37614	0.294623	301469698414000	60947000	6.19593e+07	15690000	10.067	5.71429	2.05714	12.4286	40800000	32100000	0	0	0
122	7.84997e+07	8.8945	5.98514	2.37804	0.30695	301589938782000	61911000	6.20146e+07	17010000	10.1633	5.42857	1.91429	11.7714	41000000	32100000	0	0	0
123	7.90231e+07	8.85315	6.15771	2.38171	0.311594	301715896206000	62138000	6.22215e+07	17280000	10.3255	5.14286	1.82857	11.2571	41700000	32100000	76391.4	76391.4	0
124	7.92085e+07	8.8427	6.32624	2.37285	0.323392	301853632748000	62354000	6.22613e+07	17560000	10.8067	4.85714	1.65714	10.6857	42100000	32100000	104475	104475	0
125	7.53897e+07	8.76206	6.51591	2.37913	0.320932	302068088564000	62652000	6.23184e+07	17850000	10.4648	4	1.34286	9.31429	42700000	30200000	28081.1	28081.1	0
126	8.064e+07	8.62612	6.54437	2.42711	0.292841	302351111728000	60126000	5.9153e+07	18130000	10.6336	3.14286	1	7.48571	42600000	30200000	0	0	0
127	7.93045e+07	8.53751	6.46454	2.42102	0.30192	302444172375000	60488000	5.95221e+07	18220000	10.7982	2.57143	0.8	6.37143	44100000	30200000	0	0	0
128	7.72638e+07	8.44999	6.38639	2.42503	0.3076	302553746176000	60544000	5.9581e+07	18250000	11.1106	2.57143	0.742857	6.08571	44800000	30200000	0	0	0
129	7.79503e+07	8.27764	6.32905	2.43351	0.303692	302677908958000	60460000	5.95262e+07	18290000	10.9943	2.28571	0.657143	5.65714	45200000	30200000	44477.3	44477.3	0
130	7.6445e+07	8.1421	6.25958	2.44491	0.285945	302792986826000	60384000	5.74056e+07	18300000	10.7854	1.71429	0.514286	4.74286	46300000	32600000	44471.2	44471.2	0
131	7.60968e+07	8.09337	6.2843	2.46295	0.298258	302975151770000	58480000	5.78332e+07	16830000	10.3507	1.42857	0.457143	3.77143	46000000	32600000	731981	731981	0
132	7.34405e+07	8.09544	6.35335	2.43359	0.31255	303111666637000	61275000	5.60033e+07	18230000	10.3803	1.42857	0.428571	3.25714	46800000	32600000	731981	731981	0
133	7.46441e+07	8.04287	6.33744	2.45808	0.303594	302989072523000	59055000	5.61032e+07	16730000	10.1898	1.42857	0.428571	3.17143	47000000	32600000	0	0	0
134	7.35626e+07	7.69459	5.992	2.47371	0.309377	303066617634000	58923000	5.82751e+07	16710000	9.91041	1.42857	0.457143	3.22857	48500000	33900000	30013.3	30013.3	0
135	7.35398e+07	7.36676	5.60502	2.46657	0.302981	303076492078000	58914000	5.59618e+07	16690000	10.5665	1.42857	0.485714	3.08571	48900000	33900000	87352.1	30015.5	57336.6
136	7.32348e+07	7.09025	5.15594	2.47251	0.308806	305786308916000	58659000	5.80141e+07	16720000	10.3862	1.42857	0.485714	2.85714	49100000	33900000	57346.2	0	57346.2
137	7.40154e+07	6.82073	4.63143	2.45562	0.329065	305900264902000	58621000	5.79759e+07	16060000	10.3469	1.14286	0.457143	2.62857	49500000	33900000	0	0	0
138	7.80864e+07	6.58314	4.13902	2.45518	0.32292	306015162409000	58574000	5.79297e+07	16650000	8.70614	1.14286	0.457143	2.54286	49700000	33900000	0	0	0
139	7.65094e+07	6.64618	4.14715	2.44445	0.328508	306143774296000	58483000	5.78386e+07	16950000	8.60718	1.14286	0.514286	2.57143	49600000	33900000	0	0	0
140	7.5533e+07	6.69643	4.15535	2.43995	0.312856	306290296051000	57644000	5.6852e+07	17090000	8.83704	1.42857	0.542857	2.68571	35400000	33900000	0	0	0
141	7.40696e+07	6.78875	4.12557	2.40089	0.398749	306499938521000	61885000	5.91265e+07	20220000	8.65767	1.14286	0.485714	2.6	35700000	33900000	0	0	0
142	7.38626e+07	6.92259	4.09669	2.40308	0.390929	306699219128000	61720000	5.896e+07	20260000	8.45905	1.14286	0.4	2.34286	35800000	33900000	1634.43	1634.43	0
143	7.41617e+07	7.13366	4.05581	2.45565	0.316248	307201278541000	63339000	6.28824e+07	19380000	7.77196	0.857143	0.285714	1.91429	35900000	33900000	1634.62	1634.62	0
144	7.34248e+07	7.35091	3.96223	2.46999	0.319941	307119394865000	63274000	6.31217e+07	19190000	7.71772	0.571429	0.2	1.42857	35900000	33900000	563.073	0	563.073
145	6.62182e+07	7.52017	3.88372	2.46205	0.326958	307226919271000	63279000	6.311e+07	18900000	7.32831	0.571429	0.142857	1	3.28e+07	28200000	563.378	0	563.378
146	6.12563e+07	7.56689	3.90492	2.48447	0.313274	307255291983000	62488000	6.22802e+07	18040000	7.27366	0.285714	0.114286	0.685714	33000000	28200000	360173	3331.03	356842
147	6.35261e+07	7.5953	3.96571	2.47744	0.338009	306425267797000	62219000	6.19648e+07	18710000	7.60089	0.285714	0.0857143	0.542857	33000000	28200000	360172	3330.01	356842
148	6.16051e+07	7.56921	4.04732	2.47068	0.372982	305932572262000	62197000	6.19069e+07	19410000	7.6573	0.285714	0.0571429	0.514286	33100000	28200000	0	0	0
149	6.33235e+07	7.55959	4.17022	2.48077	0.378167	306019831699000	62176000	6.1873e+07	18590000	7.69764	0.285714	0.0571429	0.428571	3.33e+07	28200000	19458.7	19458.7	0
150	6.24066e+07	7.26795	4.09643	2.48505	0.385642	306087159303000	62166000	6.18514e+07	18770000	7.59259	0	0.0571429	0.314286	31100000	28200000	19453.9	19453.9	0
151	6.2347e+07	7.04925	3.95268	2.50168	0.378132	306282939582000	69642000	6.93005e+07	23440000	6.79908	0	0.0285714	0.228571	31300000	28200000	0	0	0
152	6.19456e+07	6.95633	3.82155	2.44069	0.46113	306375582048000	69653000	6.93011e+07	23480000	6.8083	0	0.0285714	0.2	31500000	27600000	0	0	0
153	6.14339e+07	6.92609	3.7406	2.43186	0.472612	306484764332000	69672000	6.93171e+07	23410000	6.62534	0	0.0285714	0.171429	30400000	26400000	0	0	0
154	5.70243e+07	6.93003	3.59578	2.42299	0.482431	306582782019000	69770000	6.94269e+07	23340000	4.72743	0	0.0285714	0.171429	30600000	26400000	137442	137442	0
155	5.18152e+07	7.37017	3.71657	2.42806	0.4777	306833082805000	69805000	6.94604e+07	23420000	4.66903	0	0.0285714	0.171429	31000000	26400000	137422	137422	0
156	4.66761e+07	7.49056	3.65716	2.44054	0.464184	306884032787000	70554000	7.01674e+07	23910000	5.43352	0	0.0571429	0.171429	31200000	26400000	0	0	0
157	4.8603e+07	7.37078	3.54263	2.42316	0.47955	307105012506000	70286000	6.98821e+07	23780000	5.38247	0	0.0857143	0.171429	31300000	26400000	0	0	0
158	4.84657e+07	7.16756	3.32635	2.42657	0.472907	307300042602000	70393000	6.99882e+07	23950000	5.36135	0	0.0857143	0.171429	30400000	25500000	0	0	0
159	4.81718e+07	6.95258	3.09968	2.42691	0.467265	307451929356000	70552000	7.01476e+07	23710000	5.43124	0	0.0857143	0.2	30400000	25500000	423597	423597	0
160	4.78664e+07	6.75797	2.84661	2.42768	0.458401	307656562659000	70552000	7.01648e+07	24220000	4.96642	0	0.0857143	0.171429	21800000	25500000	425973	425973	0
161	4.76292e+07	6.84252	3.00735	2.41833	0.478621	306471887472000	64132000	6.37474e+07	19490000	5.49105	0	0.0857143	0.142857	21900000	25500000	2447.22	2447.22	0
162	4.73544e+07	6.90477	3.1776	2.43475	0.461076	306753742862000	64230000	6.3846e+07	19470000	5.50149	0	0.0571429	0.142857	22100000	25500000	0	0	0
163	4.71036e+07	6.9672	3.33777	2.4393	0.47059	307055359194000	64377000	6.39936e+07	19360000	5.50554	0	0.0571429	0.114286	22300000	25500000	0	0	0
164	4.70911e+07	7.16022	3.62607	2.44737	0.459735	307038984105000	64371000	6.39864e+07	19510000	5.61899	0	0.0285714	0.0857143	21100000	21000000	8520.71	8520.71	0
165	4.79649e+07	7.31094	3.81745	2.45025	0.46167	307303712405000	64250000	6.38646e+07	19390000	5.8553	0	0.0285714	0.0857143	21300000	21000000	8519.43	8519.43	0
166	4.88243e+07	7.42223	3.91911	2.46079	0.448103	307463708497000	64564000	6.41806e+07	19090000	5.79314	0	0.0285714	0.0571429	21600000	21000000	0	0	0
167	4.85342e+07	7.57881	3.98687	2.44373	0.47107	307628906623000	64539000	6.41547e+07	19070000	5.79988	0	0.0285714	0.0571429	22700000	21200000	1680.01	0	1680.01
168	4.89337e+07	7.73004	4.04753	2.43836	0.47655	307541666942000	64511000	6.41267e+07	17310000	6.35887	0	0	0.0285714	23200000	21200000	0	0	0
169	5.04022e+07	7.75126	4.01009	2.43332	0.462766	307692834929000	63843000	6.34639e+07	16710000	6.42853	0	0	0	23400000	21000000	1856.15	1856.15	0
170	5.01658e+07	7.8129	4.05235	2.43593	0.448935	307869785940000	63814000	6.34348e+07	16690000	6.36136	0	0	0	23600000	21000000	1856.13	1856.13	0
171	4.90102e+07	7.88747	4.09075	2.42501	0.452032	307935684073000	62915000	6.32285e+07	16850000	6.36899	0	0	0	24200000	21000000	0	0	0
172	4.87102e+07	7.93973	4.14671	2.36455	0.519812	308090944252000	62890000	6.32083e+07	16780000	6.37214	0	0	0	24800000	21000000	311.73	0	311.73
173	4.84183e+07	7.9853	4.1983	2.35398	0.52127	308256780735000	62887000	6.32057e+07	15400000	6.3813	0	0	0	25100000	21000000	0	0	0
174	4.85889e+07	8.03315	4.25099	2.3553	0.511029	308422709215000	62919000	6.32377e+07	15370000	6.3813	0	0	0	25600000	21000000	0	0	0
175	4.7439e+07	8.06231	4.28637	2.33299	0.518613	308576190960000	62949000	6.32674e+07	15590000	6.4018	0	0	0	26300000	23300000	0	0	0
176	4.71536e+07	7.84033	4.20163	2.31989	0.516031	308754958968000	62973000	6.32917e+07	15510000	6.38385	0	0	0	26600000	23300000	2107.06	2107.06	0
177	4.67752e+07	7.77553	4.03115	2.29406	0.52945	308930028710000	63006000	6.33254e+07	15540000	6.06989	0	0	0	20100000	23300000	2105.03	2105.03	0
178	4.64801e+07	7.71777	3.8443	2.2545	0.560929	308970931977000	63057000	6.33758e+07	15500000	6.06783	0	0	0	20300000	23300000	0	0	0
179	4.61832e+07	7.66023	3.61474	2.21848	0.584602	309016897139000	63112000	6.34309e+07	15460000	6.06174	0	0	0	20500000	23300000	292693	292665	28
180	4.53749e+07	7.59583	3.34567	2.16206	0.618649	309062091269000	63165000	6.34848e+07	15390000	4.97729	0	0	0	20600000	23300000	292601	292573	28
181	4.06295e+07	7.80718	3.25202	2.1374	0.639512	309327654330000	64725000	6.46142e+07	16940000	4.77701	0	0	0	21000000	23300000	469360	469360	0
182	4.03363e+07	7.83963	3.26794	2.15088	0.61866	309139215074000	64717000	6.46385e+07	17030000	4.77468	0	0	0	21300000	23300000	469278	469278	0
183	4.03961e+07	7.86957	3.2863	2.14608	0.628564	308963257738000	64729000	6.47004e+07	16950000	4.77208	0	0	0	21900000	23300000	61701.6	61701.6	0
184	4.03256e+07	7.89256	3.32232	2.15638	0.622951	308791386180000	64755000	6.47577e+07	16990000	4.77859	0	0	0	22100000	23300000	69377.8	69377.8	0
185	4.00836e+07	7.91579	3.36084	2.17187	0.607109	308633573620000	64648000	6.48164e+07	17220000	4.7805	0	0	0	22200000	23300000	7677.48	7677.48	0
186	3.97499e+07	7.92702	3.44513	2.16851	0.610917	308501346916000	64634000	6.48756e+07	18270000	4.77418	0	0	0	22600000	23300000	0	0	0
187	3.95566e+07	8.03487	3.52838	2.18208	0.604562	308415195104000	64601000	6.46314e+07	19050000	4.79783	0	0	0	23100000	23300000	372356	372356	0
188	3.93769e+07	8.1226	3.60049	2.15064	0.634166	308309910321000	64570000	6.46053e+07	18780000	4.80614	0	0	0	23200000	23300000	372445	372445	0
189	3.91881e+07	8.18944	3.67585	2.12746	0.637737	308309244585000	64540000	6.45765e+07	18830000	4.79871	0	0	0	23400000	23300000	0	0	0
190	3.92166e+07	8.25109	3.74206	2.11544	0.654848	308457597141000	64537000	6.45478e+07	17450000	4.67359	0	0	0	22000000	23300000	0	0	0
191	3.78512e+07	8.31844	3.75742	2.11552	0.647872	308500779871000	68795000	6.7305e+07	19400000	4.44323	0	0	0	21400000	22700000	0	0	0
192	3.87538e+07	8.27947	3.77144	2.10014	0.642936	308567676885000	68898000	6.75159e+07	17200000	4.43857	0	0	0	21400000	22700000	0	0	0
193	3.91422e+07	8.27607	3.77251	2.03945	0.681709	308679196666000	69035000	6.76832e+07	16350000	4.42306	0	0	0	21500000	22700000	0	0	0
194	3.91152e+07	8.33151	3.73411	2.03539	0.676625	308803945746000	69171000	6.80095e+07	15050000	4.39896	0	0	0	21500000	22700000	8661.53	8661.53	0
195	3.90983e+07	8.38975	3.69338	2.07862	0.651302	308933359387000	69301000	6.8473e+07	15150000	4.38839	0	0	0	21500000	22700000	8660.36	8660.36	0
196	3.90728e+07	8.39088	3.60948	2.04258	0.692772	309056555397000	69542000	6.88521e+07	14850000	4.37065	0	0	0	21500000	22700000	0	0	0
197	3.85598e+07	8.42602	3.52878	2.03012	0.694776	309185007653000	69717000	6.91309e+07	14620000	4.35875	0	0	0	21500000	22700000	0	0	0
198	3.76598e+07	8.32166	3.53253	2.05988	0.65548	309321318949000	69697000	6.94031e+07	14450000	4.34997	0	0	0	21500000	22700000	0	0	0
199	3.77116e+07	8.16798	3.56848	2.07076	0.633752	309455896885000	69846000	6.96463e+07	14330000	4.34232	0	0	0	21500000	22700000	0	0	0
200	3.55341e+07	8.01069	3.60142	2.08921	0.623797	309424091427000	69902000	6.97713e+07	14310000	4.40171	0	0	0	15700000	22700000	1780000	1781280	0
References
[1] Müller, R. D., and Dutkiewicz, A. (2018). Oceanic crustal carbon cycle drives 26-million-year atmospheric carbon dioxide periodicities. Science Advances, 4(2), eaaq0500.
[2] Matthews, K. J., Maloney, K. T., Zahirovic, S., Williams, S. E., Seton, M., and Müller, R. D. (2016). Global plate boundary evolution and kinematics since the late Paleozoic. Global and Planetary Change, 146, 226–250.
[3] Müller, R. D., Seton, M., Zahirovic, S., Williams, S. E., Matthews, K. J., Wright, N. M., et al. (2016). Ocean Basin Evolution and Global-Scale Plate Reorganization Events Since Pangea Breakup. Annual Review of Earth and Planetary Sciences, 44(1), 107–138.
[4] East, M., Müller, R. D., Williams, S. E., Zahirovic, S., and Heine, C. (2019). Subduction history reveals Cretaceous slab superflux as a possible cause for the mid-Cretaceous plume pulse and superswell events.
[5] Pall, J., Zahirovic, S., Doss, S., Hassan, R., Matthews, K. J., Cannon, J., et al. (2018). The influence of carbonate platform interactions with subduction zone volcanism on palaeo-atmospheric CO2 since the Devonian. Climate of the Past, 14(6), 857–870.
[6] Dutkiewicz, A., Müller, R. D., Cannon, J., Vaughan, S., and Zahirovic, S. (2018). Sequestration and subduction of deep-sea carbonate in the global ocean since the Early Cretaceous. Geology, 47(1), 91–94.
[7] Brune, S., Williams, S. E., and Müller, R. D. (2017). Potential links between continental rifting, CO 2 degassing and climate change through time. Nature Geoscience, 10(12), 941–946.
[8] Johansson, L., Zahirovic, S., and Müller, R. D. (2018). The Interplay Between the Eruption and Weathering of Large Igneous Provinces and the Deep-Time Carbon Cycle. Geophysical Research Letters, 45(11), 5380–5389.
*The Müller et al. (2016) model has been modified to provide the model of East et al. (2019); full details of this modification are provided within East et al.
